# Supplementary material for: In-Hospital Mortality in Non-COVID-19-Related Diseases before and during the Pandemic: A Regional Retrospective Study
Source: MDPI journal article supplement (doi:10.3390/ijerph182010886), 2021-10-16
Supplement: s1 [file s1]

**Table S1.** Observed deaths, in-hospital mortality standard rates and standardized mortality rate ratios by fortnightly period of discharge.

| Fortnight                   | 2019        |            | 2020        |            | SRR   | 95%CI       |
|-----------------------------|-------------|------------|-------------|------------|-------|-------------|
|                             | Obs. Deaths | IMR±SE     | Obs. Deaths | IMR±SE     |       |             |
| January 1 – January 15      | 681         | 42.28±1.63 | 648         | 42.79±1.69 | 1.012 | 0.908-1.128 |
| January 16 – January 31     | 767         | 34.54±1.25 | 685         | 31.58±1.21 | 0.914 | 0.825-1.014 |
| February 1 – February 15    | 690         | 33.25±1.27 | 625         | 31.82±1.28 | 0.957 | 0.859-1.066 |
| February 16 – February 28   | 538         | 31.7±1.37  | 523         | 28.5±1.25  | 0.899 | 0.797-1.014 |
| March 1 – March 15          | 640         | 31.72±1.26 | 624         | 36.94±1.48 | 1.164 | 1.043-1.3   |
| March 16 – March 31         | 667         | 32.91±1.28 | 555         | 56.75±2.45 | 1.724 | 1.539-1.932 |
| April 1 – April 15          | 497         | 25.21±1.13 | 457         | 57.76±2.73 | 2.291 | 2.016-2.603 |
| April 16 – April 30         | 544         | 31.34±1.35 | 447         | 48.78±2.33 | 1.557 | 1.373-1.765 |
| May 1 – May 15              | 499         | 27.22±1.22 | 425         | 43.68±2.13 | 1.605 | 1.409-1.827 |
| May 16 – May 31             | 536         | 25.5±1.1   | 442         | 35.39±1.69 | 1.388 | 1.223-1.574 |
| June 1 – June 15            | 547         | 28.11±1.2  | 414         | 31.55±1.56 | 1.123 | 0.988-1.276 |
| June 16 – June 30           | 502         | 27.55±1.23 | 436         | 28.77±1.38 | 1.045 | 0.918-1.188 |
| July 1 – July 15            | 507         | 27.71±1.23 | 426         | 27.57±1.34 | 0.995 | 0.874-1.132 |
| July 16 – July 31           | 529         | 27.18±1.18 | 492         | 29.48±1.33 | 1.085 | 0.959-1.227 |
| August 1 – August 15        | 512         | 32.96±1.46 | 461         | 34.6±1.62  | 1.050 | 0.925-1.191 |
| August 16 – August 31       | 528         | 33.96±1.49 | 508         | 39.67±1.77 | 1.168 | 1.034-1.32  |
| September 1 – September 15  | 479         | 30.1±1.38  | 479         | 34.39±1.58 | 1.142 | 1.006-1.297 |
| September 16 – September 31 | 516         | 28.61±1.26 | 459         | 30.74±1.44 | 1.074 | 0.947-1.219 |
| October 1 – October 15      | 464         | 25.47±1.18 | 406         | 27.04±1.35 | 1.062 | 0.929-1.214 |
| October 16 – October 31     | 486         | 24±1.09    | 503         | 32.4±1.46  | 1.350 | 1.191-1.53  |
| November 1 – November 15    | 509         | 29.15±1.29 | 489         | 41.1±1.87  | 1.410 | 1.245-1.597 |
| November 16 – November 30   | 507         | 27.21±1.21 | 516         | 44.1±1.96  | 1.621 | 1.432-1.833 |
| December 1 – December 15    | 503         | 28.55±1.27 | 523         | 46.55±2.05 | 1.630 | 1.442-1.844 |
| December 16 – December 31   | 619         | 35.45±1.43 | 582         | 48.72±2.03 | 1.375 | 1.227-1.54  |

IMR: in-hospital mortality standard rates; SE: standard error; SRR: standardized mortality rate ratio; CI: confidence interval.
